1 **Sampling strategies and pre-pandemic surveillance gaps for bat coronaviruses**

2

3

4 Lily E. Cohen<sup>1\*</sup>, Anna C. Fagre<sup>2,3</sup>, Binqi Chen<sup>4</sup>, Colin J. Carlson<sup>4</sup>, Daniel J. Becker<sup>5</sup>

5

6 <sup>1</sup>Icahn School of Medicine at Mount Sinai, New York, NY, USA

7 <sup>2</sup>Department of Microbiology, Immunology, and Pathology, College of Veterinary Medicine and

8 Biomedical Sciences, Colorado State University, Fort Collins, CO, USA

9 <sup>3</sup>Bat Health Foundation, Fort Collins, CO, USA

10 <sup>4</sup>Center for Global Health Science and Security, Georgetown University Medical Center,

11 Washington, D.C., USA

12 <sup>5</sup>Department of Biology, University of Oklahoma, Norman, OK, USA

13 \*Corresponding author: [lily.cohen@icahn.mssm.edu](mailto:lily.cohen@icahn.mssm.edu)

14

15 **Keywords:** Coronaviridae, bats, longitudinal sampling, viral ecology, open data

16 **Running head:** Coronavirus sampling and surveillance in bats

17 **Abstract**

18

19 The emergence of SARS-CoV-2, and the challenge of pinpointing its ecological and evolutionary  
20 context, has highlighted the importance of evidence-based strategies for monitoring viral dynamics  
21 in bat reservoir hosts. Here, we compiled the results of 93,877 samples collected from bats across  
22 111 studies between 1996 and 2018, and used these to develop an unprecedented open database,  
23 with over 2,400 estimates of coronavirus infection prevalence or seroprevalence at the finest  
24 methodological, spatiotemporal, and phylogenetic level of detail possible from public records.  
25 These data revealed a high degree of heterogeneity in viral prevalence, reflecting both real  
26 spatiotemporal variation in viral dynamics and the effect of variation in sampling design.  
27 Phylogenetically controlled meta-analysis revealed that the most significant determinant of  
28 successful viral detection was repeat sampling (i.e., returning to the same site multiple times);  
29 however, fewer than one in five studies longitudinally collected and reported data. Viral detection  
30 was also more successful in some seasons and from certain tissues, but was not improved by the  
31 use of euthanasia, indicating that viral detection may not be improved by terminal sampling.  
32 Finally, we found that prior to the pandemic, sampling effort was highly concentrated in ways that  
33 reflected concerns about zoonotic risk, leaving several broad geographic regions (e.g., South Asia,  
34 Latin America and the Caribbean, and most of Sub-Saharan Africa) and bat subfamilies (e.g.,  
35 Stenodermatinae and Pteropodinae) measurably undersampled. These gaps constitute a notable  
36 vulnerability for global health security and will likely be a future barrier to contextualizing the  
37 origin of novel zoonotic coronaviruses.

## 38 **Introduction**

39

40 Since the emergence of severe acute respiratory syndrome-associated coronavirus (SARS-CoV)  
41 in 2002, coronaviruses (Coronaviridae: Orthocoronavirinae) have been the subject of concern as  
42 potential pandemic threats. The group comprises four genera containing an estimated hundreds  
43 or thousands of viruses [1]. Two of these genera, the delta- and gammacoronaviruses, are  
44 primarily pathogens of birds, though they infect a handful of mammals: notably, porcine  
45 deltacoronavirus became the first shown to infect humans in 2021 [2]. The alpha- and  
46 betacoronaviruses contain all other known human-infective coronaviruses; the latter includes  
47 SARS-CoV, Middle East respiratory syndrome-related coronavirus (MERS-CoV), and severe  
48 acute respiratory syndrome coronavirus 2 (SARS-CoV-2), the three highly pathogenic  
49 coronaviruses that have caused significant morbidity and mortality in humans [3]. While alpha-  
50 and betacoronaviruses exhibit a high degree of host plasticity, there is substantial diversity of  
51 these viruses in bats, which are likely the ancestral hosts of these groups [4,5]. As such,  
52 coronaviruses have been among a handful of other clades of zoonotic pathogens (e.g.,  
53 filoviruses, lyssaviruses, and henipaviruses) that have been monitored extensively in wild bats,  
54 and continue to be the subject of ongoing surveillance [6].

55

56 Research into the natural origins of SARS-CoV-2, and a broader renewed interest in coronavirus  
57 ecology and evolution, have highlighted the immense value of these surveillance studies.  
58 However, outside of long-term coordinated research projects, field sampling is often  
59 opportunistic in response to concerns about spillover, and capacity for systematic sampling is  
60 frequently financially- or logistically-constrained [7]. For example, prior comparative analyses of  
61 bat filovirus and henipavirus positivity have found that only a small fraction of studies report  
62 longitudinal data, limiting inference into temporal dynamics of infection in bats [6]. In turn, this  
63 limits the interpretability of these data in aggregate: for example, single sampling events can bias  
64 prevalence estimates in biologically meaningful ways (e.g., if sampling is more convenient in  
65 one season over another), and may lead to non-randomly missing data. In contrast, explicit  
66 spatiotemporal sampling designs can identify seasonal and environmental drivers of viral  
67 prevalence and shedding intensity, but these are logistically challenging and can necessitate  
68 prioritizing either spatial or temporal replication at the expense of the other scale [6]. These are

69 essential considerations for study design, particularly if the ultimate goal is to explain and predict  
70 pathogen spillover, a dynamic process that is driven by geographical and temporal variation in  
71 infection prevalence and shedding from reservoir hosts [6,8], and the relative importance of non-  
72 spatiotemporal factors that may impact virus positivity (e.g., tissues sampled, use of euthanasia,  
73 diagnostic method) further warrants examination. Presently, our ability to quantify whether and  
74 how these factors shape global assessments of coronavirus spillover risk is limited by a lack of  
75 standardized and aggregated data from disparate studies.

76  
77 Here, we compiled a standardized global database of infection prevalence and seroprevalence  
78 estimates from pre-pandemic coronavirus testing in wild bats, alongside relevant metadata on bat  
79 and viral taxonomy, study methodology, bat demography and seasonality, and ecological  
80 context. We first identified global biases in the distribution and intensity of pre-pandemic bat  
81 coronavirus surveillance, followed by comparative analyses to quantify phylogenetic signal in  
82 sampling effort and identify especially oversampled or undersampled bat clades. Next, we used a  
83 phylogenetically controlled meta-analysis to identify study designs, spatiotemporal factors, and  
84 biological traits that predict higher viral prevalence, with the aim of identifying potential ways to  
85 optimize future sampling. More broadly, we evaluate the global state of coronavirus surveillance  
86 in natural bat hosts prior to SARS-CoV-2-motivated research efforts.

87

## 88 **Results**

89

### 90 *Descriptive analyses*

91 From publicly available literature over the last quarter-century, we were able to recover data on  
92 93,877 tests worth of coronavirus surveillance in bats. Over 90% of the 2,434 data points in our  
93 database report infection prevalence (93.7%; compared to 6.3% seroprevalence data ascertained  
94 using a mix of immunologic assays, including ELISA, western blot, and indirect  
95 immunofluorescence). Within the pooled-coronavirus genera (i.e., alpha- and betacoronavirus)  
96 infection prevalence dataset, nearly 95% of estimates used PCR targeting the RNA-dependent  
97 RNA polymerase (RdRp) gene; other gene targets included subunits of the coronavirus spike  
98 protein, the nucleocapsid gene, or the envelope protein. Of the 99.6% of rows detecting  
99 coronaviruses via PCR, approximately 56% used single-round PCR as opposed to nested PCR or

100 multiple PCR assays in parallel (e.g., targeting different genes on the same RNA sample). More  
101 than half of these records (53.8%) based their primers on protocols from four past studies [9–12].  
102 34.8% of the pooled-coronavirus genera infection prevalence records were derived from studies  
103 that had euthanised their sampled bats. Table S2 shows the distribution of tissue types analyzed  
104 and the associated percentages of positive and zero infection prevalence values. Fecal samples  
105 and rectal swabs were the most common tissue used to detect coronavirus RNA. Sex and/or  
106 reproductive status of the bats sampled was only described in 12.6% of studies (14/111),  
107 resulting in 10% of individual prevalence records being stratified by sex.

108

### 109 *Spatial bias in surveillance effort*

110 Prior to the COVID-19 pandemic, we found recoverable data describing sampling of wild bats  
111 for coronaviruses across 54 countries spanning six continents. However, we found that the  
112 distribution and intensity of viral surveillance has been starkly uneven (Fig. 1). Sampled  
113 countries varied in having one to 32 bat coronavirus studies (Fig. 1a), with the number of total  
114 samples tested ranging from four to 26,313 (Fig. 1b). Whereas sampling has occurred across all  
115 North American countries, both Central America and South America have had sparse  
116 surveillance. Similarly, sampling in sub-Saharan Africa as well as Central and South Asia has  
117 been inconsistent, with the majority of global surveillance having taken place in China, and to a  
118 lesser extent other regions of Southeast Asia. A generalized linear model (GLM) of binary  
119 sampling effort ( $\chi^2 = 12.08$ ,  $p = 0.02$ ,  $R^2 = 0.04$ ) confirmed that countries in Asia and Europe  
120 were marginally more likely to be sampled for bat coronaviruses than those in the Americas  
121 (Table S3). We found more substantial geographic biases regarding the relative intensity of  
122 sampling, specifically from the number of studies ( $\chi^2 = 17.08$ ,  $p = 0.002$ ,  $R^2 = 0.05$ ) and the  
123 number of tested samples ( $\chi^2 = 19549$ ,  $p < 0.001$ ,  $R^2 = 0.11$ ). Post-hoc comparisons from GLMs  
124 revealed significantly more studies per country in Asia compared to Africa and to Europe (Table  
125 S4). Similarly, the greatest contrast in total number of tested samples was between Asia and  
126 Europe (risk ratio [RR] = 4.41) and between the Americas and Europe (RR = 2.11; Table S5).

127

### 128 *Taxonomic biases in surveillance effort*

129 Over one in four bat species (363 species of the 1,287 included in our phylogeny [13]) were at  
130 some point targeted by pre-pandemic coronavirus surveillance. Surprisingly, bats have been

131 sampled relatively evenly across the phylogeny (Fig. 2a). Indeed, we only identified intermediate  
132 phylogenetic signal in binary sampling effort ( $D = 0.88$ ) that departed from both phylogenetic  
133 randomness ( $p < 0.001$ ) and Brownian motion models of evolution ( $p < 0.001$ ). Similarly,  
134 phylogenetic factorization [14], a graph-partitioning algorithm based on the bat phylogeny, did  
135 not identify any bat clades that differed significantly in their fraction of sampled species. In  
136 contrast, we observed stronger taxonomic biases in sampling intensity. The number of studies  
137 per sampled species ranged from one to 24 (*Miniopterus schreibersii*), whereas the number of  
138 total samples tested ranged from one to 16,628 (*Rhinolophus sinicus*). The number of studies per  
139 sampled species showed low phylogenetic signal ( $\lambda = 0.04$ ) that departed from Brownian motion  
140 models of evolution ( $p < 0.001$ ) but not phylogenetic randomness ( $p = 0.35$ ); phylogenetic  
141 factorization did, however, more flexibly identify four bat clades with significantly greater mean  
142 numbers of studies than the paraphyletic remainder (Fig. 2b): a subclade of the genus *Myotis*  
143 (including both European and Asian species), a subclade of the tribe Pipistrellini (including  
144 pipistrelle and noctule bats), the sister families Hipposideridae and Rhinolophidae, and the whole  
145 genus *Miniopterus* (Table S8).

146  
147 For the total number of tested samples per species, we instead observed more intermediate  
148 phylogenetic signal ( $\lambda = 0.2$ ) that departed from both Brownian motion models of evolution ( $p <$   
149  $0.001$ ) as well as phylogenetic randomness ( $p < 0.001$ ). Accordingly, phylogenetic factorization  
150 identified a total of 23 clades with differential intensities of sampling effort, seven of which had  
151 relatively more tested samples and 16 of which had relatively fewer tested samples (Fig. 2c). The  
152 top clades with comparatively fewer total samples included the sister families Hipposideridae  
153 and Rhinolophidae as well as the above subclade of the tribe Pipistrellini, suggesting a greater  
154 number of publications on these bats but fewer tested samples. However, smaller subclades of  
155 the Hipposideridae and Rhinolophidae families were some of the most heavily sampled,  
156 suggesting key biases in sampling effort within these taxa that have been the subject of much  
157 coronavirus research (Table S9). Finally, members of the subfamily Stenodermatinae within  
158 phyllostomid bats were undersampled, as were several genera within the Pteropodinae subfamily  
159 (i.e., *Pteropus*, *Eidolon*, and *Acerodon*).

160  
161

162

163 *Heterogeneity in coronavirus infection prevalence*

164 Using a phylogenetic meta-analysis model that accounted for sampling variance, bat phylogeny,  
165 additional species effects, and within- and between-study variation [15,16], we observed high  
166 heterogeneity among coronavirus infection prevalence estimates ( $I^2 = 86.32\%$ ,  $Q_{2075} = 12995.13$ ,  
167  $p < 0.0001$ ). This heterogeneity was mainly driven by within-study (42.15%) and between-study  
168 effects (37%), with lesser contributions from bat phylogeny (7.04%) and additional species  
169 effects (0.13%). When repeating this intercept-only model for alphacoronavirus- and  
170 betacoronavirus-specific datasets, prevalence showed similar patterns of heterogeneity  
171 (alphacoronavirus:  $I^2 = 82.37\%$ ,  $Q_{1769} = 8759.34$ ,  $p < 0.0001$ ; betacoronavirus:  $I^2 = 76.9\%$ ,  $Q_{1626}$   
172  $= 6043.81$ ,  $p < 0.0001$ ), driven primarily by within-study (alphacoronavirus: 46.53%;  
173 betacoronavirus: 36.43%) and between-study effects (alphacoronavirus: 29.003%;  
174 betacoronavirus: 27.10%), and secondarily by phylogenetic (alphacoronavirus: 6.83%;  
175 betacoronavirus: 13.37%) and other species-level effects (alphacoronavirus: 0.003%;  
176 betacoronavirus: 0.003%).

177

178 *Methodological and biological predictors of infection prevalence*

179 When considering our suite of methodological and biological predictors in phylogenetic meta-  
180 analysis models, the fixed effects explained approximately 20% of the variance in infection  
181 prevalence (pooled-coronavirus genera  $R^2: 0.21$ ; alphacoronavirus-only  $R^2: 0.21$ ;  
182 betacoronavirus-only  $R^2: 0.20$ ). Across all three datasets, repeat sampling was associated with a  
183 0.84-1.6% percentage point increase in coronavirus prevalence (pooled coronavirus:  
184 untransformed  $\beta = 0.15$ ; 95% confidence interval (CI) 0.06-0.25,  $p < 0.005$ ; alphacoronavirus:  
185 untransformed  $\beta = 0.14$ ; 95% 0.03-0.26,  $p < 0.05$ ; betacoronavirus: untransformed  $\beta = 0.14$ ; 95%  
186 CI: 0.04-0.24,  $p < 0.05$ ) as compared to one-time (single) sampling (Fig. 3). Similarly,  
187 longitudinal study design predicted a small increase ( $\sim 0.2$ - $0.3\%$  percentage points) in positive  
188 viral detection in the pooled coronavirus (untransformed  $\beta = 0.06$ ; 95% CI: 0.02-0.11,  $p < 0.01$ )  
189 and alphacoronavirus-only (untransformed  $\beta = 0.07$ ; 95% CI: 0.02-0.12,  $p < 0.01$ ) datasets, as  
190 opposed to cross-sectional sampling. Other model variables including tissue type, sampling  
191 season, bat family, PCR type, and gene target showed weak or no significant association with



192 coronavirus positivity across all datasets. Notably, use of euthanasia was not associated with  
193 greater ability to detect coronavirus RNA.

194

## 195 **Discussion**

196

197 Since the onset of the COVID-19 pandemic, significantly increased research attention has been  
198 paid to bats as potential reservoir hosts of coronaviruses (including, presumably, many with  
199 zoonotic potential) [17–19]. While other studies have reported data on the geographical and  
200 taxonomic distribution of reported bat hosts [19,20], ours has generated the first standardized,  
201 PRISMA-generated open database of coronavirus surveillance in bats that provides  
202 disaggregated data (including negative results). In doing so, our study takes one of many first  
203 steps towards building an open database of wildlife disease surveillance with relevance to  
204 pandemic prediction and preparedness [21].

205

206 Our initial dataset represents a systematic snapshot of bat coronavirus research prior to the  
207 COVID-19 pandemic and includes 111 studies, 2,434 records, and a total of 93,877 bat samples.  
208 Our geographic and taxonomic analyses suggest a large focus on bat sampling in China  
209 compared to (and potentially at the expense of) gaps throughout South Asia, the Americas, Sub-  
210 Saharan Africa, and East Africa. Additionally, very few studies sampled in the United States and  
211 Canada (two and three, respectively). However, we acknowledge that progress towards  
212 addressing some of these gaps has been made since the onset of the pandemic; for example, more  
213 recent bat surveillance work has taken place in Latin America and Madagascar [19,22–26].  
214 While phylogenetic coverage across bats is a strength of the dataset, we noted key taxonomic  
215 biases in the intensity of sampling efforts, with subclades of the Hipposideridae and  
216 Rhinolophidae families being some of the most heavily sampled taxa versus significant  
217 undersampling within the Stenodermatinae and Pteropodinae subfamilies. Priorities for future  
218 research should include strengthening surveillance efforts in these undersampled regions and bat  
219 taxa, especially as some have been predicted to harbor novel betacoronaviruses [19].

220

221 After controlling for bat phylogeny, sampling variance, and both study- and observation-level  
222 heterogeneity, repeat sampling and longitudinal study design were the only consistently



223 significant predictors of positive coronavirus prevalence. Thus, to optimize detection sensitivity,  
224 substantial resources and careful planning should be allocated towards following this study  
225 format [27]. Additionally, euthanasia did not impact the likelihood of viral detection; thus,  
226 terminal sampling may not be necessary for studies attempting to detect coronavirus RNA, and  
227 our analysis suggests that coronavirus positivity will not be substantially biased by tissue or  
228 sample type. This is important for researchers, given that coronavirus surveillance can be  
229 accomplished with opportunistic (e.g., roost feces) and readily accessible (e.g., museum-derived)  
230 samples [28]. Further, avoiding euthanasia reduces negative impacts of virus surveillance studies  
231 on bat population dynamics, and also facilitates true longitudinal, mark-recapture designs.

232

233 Finally, our systematic data compilation process revealed marked challenges in synthesizing  
234 viral surveillance data from wildlife studies. Although study-level effects are in part accounted  
235 for with the random effects structure of our meta-analysis, we note that at least some of our non-  
236 significant results could still be due to variability in study format, sampling design, and  
237 reporting. To reduce this risk in future analyses, we encourage researchers collecting these data  
238 to be methodical in reporting their data at the finest resolution possible (i.e., fully stratified by  
239 location, timepoint, bat species, virus species or strain, tissue type, etc.). In the longer term,  
240 developing and adopting data standards for reporting these types of data—and developing real-  
241 time channels to aggregate them with standardized metadata—could significantly improve their  
242 ability to address key questions about transmission dynamics, bat immunology, viral evolution,  
243 and spillover risk.

## 244 **Methods**

245

### 246 *Systematic review*

247 To identify studies quantifying the proportion of wild bats positive for alpha- or  
248 betacoronaviruses using PCR or serological methods, we followed the Preferred Reporting Items  
249 for Systematic Reviews and Meta-Analyses (PRISMA) protocol (Figure S1) [29]. We  
250 systematically searched Web of Science, PubMed, and Global Health (a database comprising  
251 publications from the Public Health and Tropical Medicine database and CAB Abstracts).  
252 PubMed searches used the following string: (bat\* OR Chiroptera\*) AND (coronavirus\* OR  
253 CoV\*). Web of Science and Global Health (comprised of CAB Abstracts and Public Health and  
254 Tropical Medicine database) searches used the following string: (bat\* OR Chiroptera\*) AND  
255 (coronavirus\* OR CoV\*) AND (wild\*). Searches were performed on September 24, 2020.

256

257 We screened a total of 1,016 abstracts for studies that included sampling of wild bats for  
258 coronaviruses. Publications were excluded if they did not assess coronavirus prevalence or  
259 seroprevalence in bats or were published in languages other than English. In total, we identified a  
260 total of 159 candidate articles that we screened for these data. Of these, 111 studies tested bats  
261 for coronaviruses, reported reusable data, and were included in our final, publicly available  
262 dataset. Geographic and taxonomic analyses, which did not rely on prevalence proportion  
263 positive, were performed on a 109-study subset of the public dataset which excludes records with  
264 genus- or family-level versus species-level bat data and includes seroprevalence data as well as  
265 data that could not be used to calculate prevalence (e.g., number of samples corresponds to  
266 geographic region rather than bat species). Infection prevalence analyses were performed on a  
267 107-study subset of the public dataset. Each of these two datasets were then divided into three  
268 more: pooled-coronavirus genera, alphacoronavirus genus-only, and betacoronavirus genus-only  
269 (Table S1). The datasets used for geographic and taxonomic analyses, which included  
270 seroprevalence data as well as data that could not be used to calculate prevalence (e.g., number  
271 of samples corresponds to geographic region rather than bat species) had 176 (pooled-  
272 coronavirus genera), 56 (alphacoronavirus genus-only), and 143 (betacoronavirus genus-only)  
273 more rows than the corresponding infection prevalence datasets.

274

275 Our aim was to provide a comprehensive record of bat coronavirus surveillance up to the  
276 beginning of the COVID-19 pandemic, and our sample necessarily omits some more recent  
277 publications that have reanalyzed samples motivated by investigations into the evolutionary  
278 origins of SARS-CoV-2 and other L2 lineage sarbecoviruses. It also omits the final dataset  
279 compiled by the USAID PREDICT dataset and released at the end of 2020. While these data are  
280 an incomparable resource, their scope and standardized format makes them a substantively  
281 different kind of data than all other studies we analyze here; these data have been extensively  
282 analyzed elsewhere [1]. Perhaps most importantly, the majority of studies that report primary  
283 data on bat coronavirus testing by this program are included in our dataset.

284

### 285 *Data collection*

286 Our initial dataset consists of a total of 111 studies and 2,434 records. Each record provides a  
287 prevalence or seroprevalence estimate at the finest spatiotemporal, methodological, and  
288 phylogenetic scale reported. More precisely, each unique record includes a distinct combination  
289 of coronavirus genus; bat genus, family, and/or species; sampled tissue; detection method (i.e.,  
290 PCR or serology); gene/protein target; date, and geographic location (sampling country, state,  
291 and specific site and/or geographic coordinates, if available). Detection estimates derived at finer  
292 phylogenetic scales (e.g., virus strain) were aggregated to genus. As observed previously for bat  
293 filoviruses and henipaviruses, some studies pooled coronavirus detection estimates for more than  
294 one bat species [6]. Rows with these pooled prevalence estimates were excluded from  
295 subsequent statistical analyses. Sampling strategies were classified as longitudinal and cross-  
296 sectional: prevalence estimates derived from repeated sampling at one location were marked as  
297 longitudinal, while those derived from one location on a specific date were listed as cross-  
298 sectional. Thus, most studies (93.6%) yielded more than one detection estimate record: for  
299 example, a longitudinal study that provides individual coronavirus detection estimates from two  
300 types of tissue in a given bat species on six separate dates spanning several years would result in  
301 at least 12 records in the dataset.

302

303 In addition to these spatial and temporal components, we recorded data on detection  
304 methodology (e.g., single or nested/multiple PCR for RNA detection, ELISA for antibody  
305 detection, or immunohistochemistry), additional virus taxonomy (e.g., subgenus, strain), PCR

306 primers (and their gene targets), and whether the authors included information on the sex of the  
307 sampled bats or the use of euthanasia.

308

### 309 *Geographic and taxonomic analyses of sampling effort*

310 With these data, we assessed geographic and taxonomic patterns in bat sampling effort. For the  
311 former, we fit a generalized linear model (GLM) with whether a country had been sampled for  
312 bat coronaviruses as a binomial response and region as the predictor in R. For sampled countries  
313 ( $n=55$ ), we fit equivalent GLMs that modeled the number of unique studies and the total samples  
314 per country as a Poisson-distributed response. For each GLM, we assessed fit using McFadden's  
315  $R^2$  and the *performance* package [30]. We also adjusted for the inflated false-discovery rate in  
316 post-hoc comparisons using *emmeans* [31].

317

318 For taxonomic patterns, we derived equivalent response variables across bat species, using a  
319 recent phylogeny as a taxonomic backbone [13]. For all bat species in this phylogeny ( $n = 1287$ ),  
320 we derived a binary response for whether a species had been sampled for coronaviruses. For  
321 those sampled species ( $n = 363$ ), we derived the number of unique studies and the total samples.  
322 Using the *caper* package [32], we first estimated phylogenetic signal in sampling effort (i.e., the  
323 propensity for related bat species to be sampled in a similar intensity). For binary sampling  
324 effort, we calculated  $D$ , where a value of 1 indicates a phylogenetically random trait distribution  
325 and 0 indicates phylogenetic clustering under a Brownian motion model of evolution [33]. For  
326 sampled species, we estimated Pagel's  $\lambda$  for the  $\log_{10}$ -transformed number of studies and samples  
327 [34]. Next, we applied a graph-partitioning algorithm, phylogenetic factorization, to more  
328 flexibly identify any bat clades across taxonomic levels that differ in sampling effort. With a  
329 standardized taxonomy from our bat phylogeny [13], we used the *phylofactor* package to  
330 partition binary sampling effort, number of studies, and number of samples in a series of iterative  
331 GLMs for each edge in the tree [14,35]. As in our geographic analyses, we modeled these  
332 variables with binomial and Poisson distributions. We then determined the number of significant  
333 clades using Holm's sequentially rejective test with a 5% family-wise error rate [36].

334

### 335 *Phylogenetic meta-analysis of infection prevalence*

336 We first used the *metafor* package to calculate Freeman–Tukey double arcsine transformed  
337 proportions of coronavirus infection-positive bats and their corresponding sampling variances  
338 [16 2010]. We then built two hierarchical meta-analysis models for three infection prevalence  
339 datasets: the global dataset, an alphacoronavirus-specific dataset, and a betacoronavirus-specific  
340 dataset (see Table S1 for the sample size per model). Each model was fit using restricted  
341 maximum likelihood and included bat species and phylogeny (using the previous bat tree) as  
342 random effects alongside an observation-level random effect nested within a study-level effect  
343 [15]. The first model (i.e., model 1) for each dataset only included an intercept and was used to  
344 estimate  $I^2$ , which quantifies the contribution of true heterogeneity (rather than noise) to variance  
345 in infection prevalence [37]. We report both the overall  $I^2$  per dataset as well as the proportional  
346  $I^2$  for each random effect, and we used Cochran’s  $Q$  to test if such heterogeneity was greater than  
347 that expected by sampling error alone. The second model (i.e., model 2) for each dataset  
348 included the following moderators: sampling method (repeat vs. single) study type (longitudinal  
349 vs. cross-sectional sampling), PCR type (nested/multiple vs. single), tissue analyzed, whether  
350 terminal sampling was performed, bat family, sampling season, and gene target. We calculated  
351 variance inflation factors of all moderators in the linear model: the moderators displayed no  
352 substantial collinearity [38]. To facilitate estimating model coefficients, we removed levels for  
353 any moderators with  $n < 3$ . For each iteration of model 2, we assessed moderator significance  
354 using the  $Q$  test (i.e., a Wald-like test of all coefficients per moderator) and estimated a pseudo-  
355  $R^2$  as the proportional reduction in the summed variance components compared against those  
356 from an intercept-only model [39].

357

## 358 **Acknowledgements**

359

360 This work was supported by funding to the Viral Emergence Research Initiative (VERENA)  
361 consortium, including NSF BII 2021909, as well as by the National Institute of General Medical  
362 Sciences of the National Institutes of Health (P20GM134973).

363

## 364 **Competing interests**

365

366 The authors declare no competing interests.

367 **Author contributions**

368

369 D.J.B., C.J.C., and L.E.C. devised the study. L.E.C., A.C.F., and B.C. performed the data  
370 collection. D.J.B. conducted the geographic and taxonomic analyses. L.E.C. conducted the  
371 phylogenetically controlled meta-analysis. L.E.C. and D.J.B. generated all figures and tables.  
372 L.E.C., A.C.F., C.J.C., and D.J.B. interpreted the results. L.E.C., A.C.F., C.J.C., and D.J.B. wrote  
373 the manuscript. All authors reviewed the manuscript and approved the submitted version.

374

375 **Data and code availability**

376

377 The primary dataset is available on Github ([www.github.com/viralemergence/datacov](https://www.github.com/viralemergence/datacov); DOI:  
378 10.5281/zenodo.6644163). The unprocessed data and scripts to generate the primary dataset (and  
379 all other derived datasets) and to replicate all analyses and visualizations are available at  
380 [www.github.com/viralemergence/batgap](https://www.github.com/viralemergence/batgap); DOI: 10.5281/zenodo.6644081).

381

## Figures and Tables

382

383 **Figure 1. Geographic distribution of bat coronavirus sampling effort, defined by the**  
384 **number of studies per country (a) and the number of samples tested per country (b).**

385 Sampled countries varied in having one to 32 bat coronavirus studies (a), with the number of  
386 total samples tested ranging from four to 26,313 (b). A disproportionate number of bat  
387 coronavirus studies and testable samples were conducted and assayed in China, likely reflecting  
388 interest in the subgenus *Sarbecovirus* and the risk of future SARS-like virus emergence. Many  
389 areas were severely understudied, particularly relative to ecological and evolutionary risk factors  
390 for emergence [19]. In particular, sampling in Central and South America, sub-Saharan Africa,  
391 and Central and South Asia was notably limited.

392

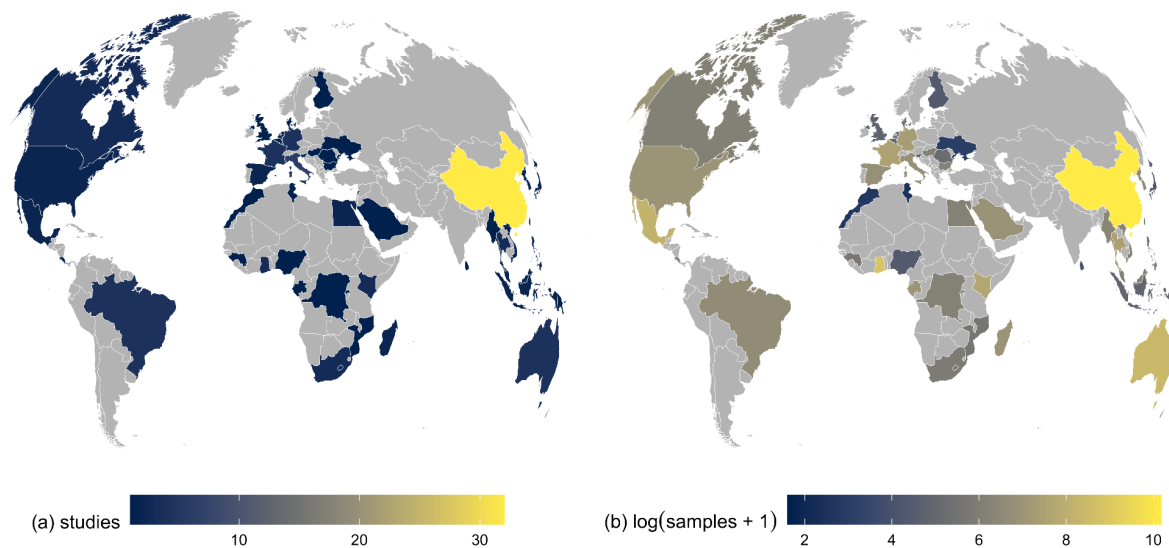

393



394 **Figure 2. Evolutionary distribution of bat coronavirus sampling effort, defined as whether**  
395 **a bat species has been sampled (a), the number of studies (b), and the number of samples**  
396 **tested (c).** Clades identified by phylogenetic factorization with greater or lesser sampling effort  
397 compared to a paraphyletic remainder are shown in red and blue, respectively, alongside clade  
398 numbers per analysis. Phylogenetic factorization did not identify any taxonomic patterns in  
399 binary sampling effort across the bat phylogeny (a) but did identify a number of bat clades within  
400 sampled bat species that have been particularly well-sampled for coronaviruses, both in terms of  
401 number of studies (b; Table S8) and number of samples (c; Table S9, only the first 10  
402 phylogenetic factors are displayed). For analyses of total studies and tested samples, segment  
403 length corresponds to the relative degree of sampling effort.  
404

(a) binary studied

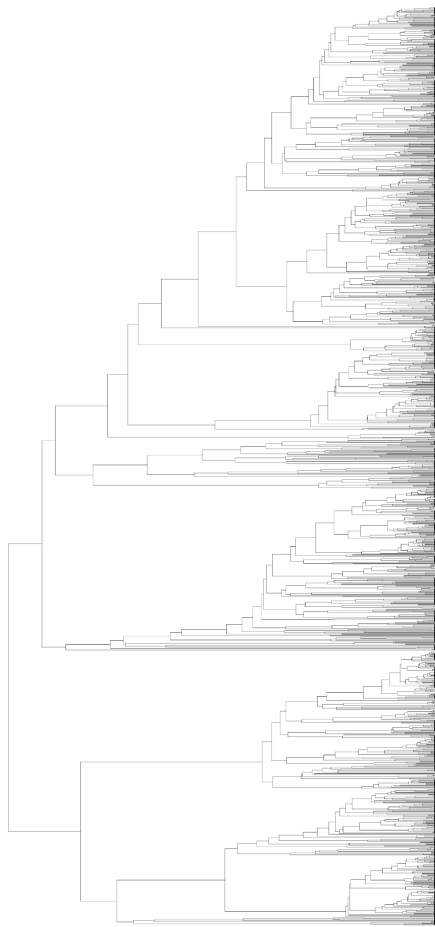

(b)  $\log_{10}(\text{studies})$

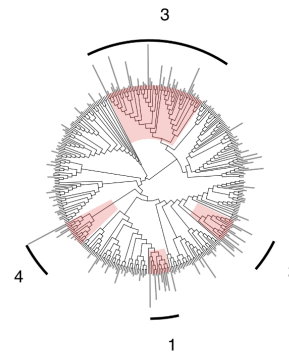

(c)  $\log_{10}(\text{samples})$

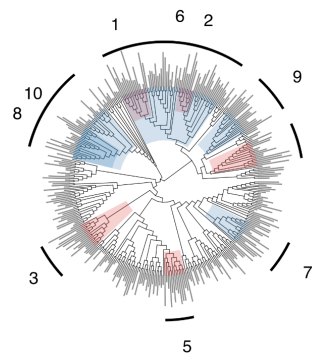

405

406 **Figure 3. Methodological and biological predictors of coronavirus prevalence in wild bats.**

407 Phylogenetic meta-analysis model coefficients and 95% confidence intervals, estimated using  
 408 restricted maximum likelihood (REML) for each of our three datasets. Colors indicate the 11  
 409 variables included in each model (binary covariates for sampling season). Estimate confidence  
 410 intervals are shaded by whether they cross zero (the vertical dashed line), with increased  
 411 transparency denoting non-significant effects. The intercept contains the following reference  
 412 levels: single sampling (sampling method); cross-sectional study (study format); single PCR  
 413 (PCR type); fecal, rectal, or anal sample (tissue type); euthanasia not used (euthanasia use);  
 414 Craseonycteridae (bat family); not fall, not winter, not spring, and not summer (sampling  
 415 season); and RNA-dependent RNA polymerase (RdRp) only (gene target).

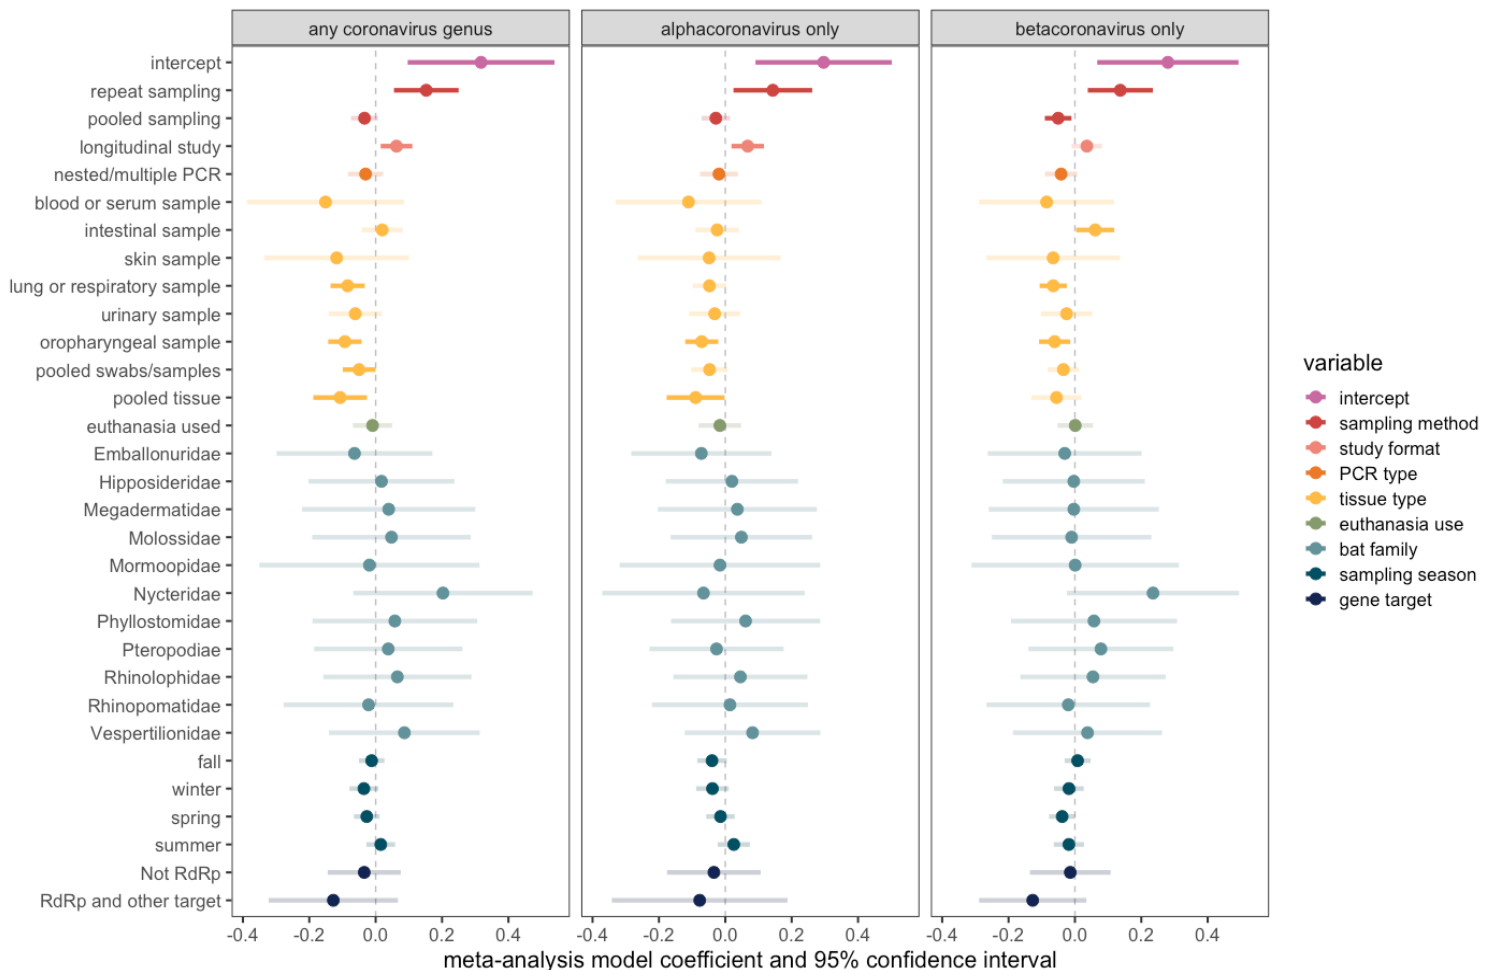

416

417

418 **Table 1. Meta-analysis of coronavirus prevalence across studies.** ANOVA table from the  
419 phylogenetic meta-analysis model fit using REML to all data and each data subset  
420 (alphacoronavirus only or betacoronavirus only). For each variable, we provide Cochran's  $Q$ , the  
421 associated degrees of freedom, and the  $p$  value.

422

|                 | any coronavirus genus |      |         | alphacoronavirus only |      |       | betacoronavirus only |      |         |
|-----------------|-----------------------|------|---------|-----------------------|------|-------|----------------------|------|---------|
|                 | $Q$                   | $df$ | $p$     | $Q$                   | $df$ | $p$   | $Q$                  | $df$ | $p$     |
| sampling method | 16.754                | 2    | < 0.001 | 9.516                 | 2    | 0.009 | 18.765               | 2    | < 0.001 |
| study format    | 6.650                 | 1    | 0.01    | 7.283                 | 1    | 0.007 | 2.380                | 1    | 0.123   |
| PCR type        | 1.279                 | 1    | 0.258   | 0.428                 | 1    | 0.513 | 2.833                | 1    | 0.092   |
| tissue type     | 36.536                | 8    | < 0.001 | 15.556                | 8    | 0.049 | 29.398               | 8    | < 0.001 |
| euthanasia use  | 0.098                 | 1    | 0.755   | 0.254                 | 1    | 0.614 | 0.001                | 1    | 0.975   |
| bat family      | 12.679                | 11   | 0.315   | 11.670                | 11   | 0.389 | 12.617               | 11   | 0.319   |
| sampling season | 8.406                 | 4    | 0.078   | 10.177                | 4    | 0.038 | 7.263                | 11   | 0.123   |
| gene target     | 1.989                 | 2    | 0.370   | 0.556                 | 2    | 0.758 | 2.408                | 2    | 0.300   |

423

## 424 References

- 425 1. Anthony SJ, Johnson CK, Greig DJ, Kramer S, Che X, Wells H, et al. Global patterns in  
426 coronavirus diversity. *Virus Evol.* 2017;3.
- 427 2. Lednicky JA, Tagliamonte MS, White SK, Elbadry MA, Alam MM, Stephenson CJ, et al.  
428 Independent infections of porcine deltacoronavirus among Haitian children. *Nature.* 2021;600:  
429 133–137.
- 430 3. Zhu Z, Lian X, Su X, Wu W, Marraro GA, Zeng Y. From SARS and MERS to COVID-  
431 19: a brief summary and comparison of severe acute respiratory infections caused by three highly  
432 pathogenic human coronaviruses. *Respir Res.* 2020;21: 1–14.
- 433 4. Woo PCY, Lau SKP, Li KSM, Poon RWS, Wong BHL, Tsoi H-W, et al. Molecular  
434 diversity of coronaviruses in bats. *Virology.* 2006;351: 180–187.
- 435 5. Woo PCY, Lau SKP, Lam CSF, Lau CCY, Tsang AKL, Lau JHN, et al. Discovery of  
436 seven novel Mammalian and avian coronaviruses in the genus deltacoronavirus supports bat  
437 coronaviruses as the gene source of alphacoronavirus and betacoronavirus and avian  
438 coronaviruses as the gene source of gammacoronavirus and deltacoronavirus. *J Virol.* 2012;86:  
439 3995–4008.
- 440 6. Becker DJ, Crowley DE, Washburne AD, Plowright RK. Temporal and spatial  
441 limitations in global surveillance for bat filoviruses and henipaviruses. *Biol Lett.* 2019;15:  
442 20190423.
- 443 7. Nusser SM, Clark WR, Otis DL, Huang L. Sampling considerations for disease  
444 surveillance in wildlife populations. *Wildfire.* 2008;72: 52–60.
- 445 8. Plowright RK, Eby P, Hudson PJ, Smith IL, Westcott D, Bryden WL, et al. Ecological  
446 dynamics of emerging bat virus spillover. *Proc Biol Sci.* 2015;282: 20142124.
- 447 9. Poon LLM, Chu DKW, Chan KH, Wong OK, Ellis TM, Leung YHC, et al. Identification  
448 of a novel coronavirus in bats. *J Virol.* 2005;79: 2001–2009.
- 449 10. Woo PCY, Lau SKP, Chu C-M, Chan K-H, Tsoi H-W, Huang Y, et al. Characterization  
450 and complete genome sequence of a novel coronavirus, coronavirus HKU1, from patients with  
451 pneumonia. *J Virol.* 2005;79: 884–895.
- 452 11. de Souza Luna LK, Heiser V, Regamey N, Panning M, Drexler JF, Mulangu S, et al.  
453 Generic detection of coronaviruses and differentiation at the prototype strain level by reverse  
454 transcription-PCR and nonfluorescent low-density microarray. *J Clin Microbiol.* 2007;45: 1049–  
455 1052.
- 456 12. Watanabe S, Masangkay JS, Nagata N, Morikawa S, Mizutani T, Fukushi S, et al. Bat  
457 coronaviruses and experimental infection of bats, the Philippines. *Emerg Infect Dis.* 2010;16:  
458 1217–1223.

- 459 13. Upham NS, Esselstyn JA, Jetz W. Inferring the mammal tree: Species-level sets of  
460 phylogenies for questions in ecology, evolution, and conservation. *PLoS Biol.* 2019;17:  
461 e3000494.
- 462 14. Washburne AD, Silverman JD, Morton JT, Becker DJ, Crowley D, Mukherjee S, David  
463 LA, Plowright RK. Phylofactorization: a graph partitioning algorithm to identify phylogenetic  
464 scales of ecological data. *Ecological Monographs.* 2019 May;89(2):e01353.
- 465 15. Cinar O, Nakagawa S, Viechtbauer W. Phylogenetic multilevel meta-analysis: A  
466 simulation study on the importance of modelling the phylogeny. *Methods Ecol Evol.* 2022;13:  
467 383–395.
- 468 16. Viechtbauer W. Conducting meta-analyses in R with the metafor package. *Journal of*  
469 *Statistical Software.* 2010;36(3):1-48.
- 470 17. Latinne A, Hu B, Olival KJ, Zhu G, Zhang L, Li H, et al. Origin and cross-species  
471 transmission of bat coronaviruses in China. *Nat Commun.* 2020;11: 4235.
- 472 18. Wacharapluesadee S, Tan CW, Maneerom P, Duengkae P, Zhu F, Joyjinda Y, et al.  
473 Evidence for SARS-CoV-2 related coronaviruses circulating in bats and pangolins in Southeast  
474 Asia. *Nat Commun.* 2021;12: 972.
- 475 19. Becker DJ, Albery GF, Sjodin AR, Poisot T, Bergner LM, Chen B, et al. Optimising  
476 predictive models to prioritise viral discovery in zoonotic reservoirs. *Lancet Microbe.* 2022.
- 477 20. Ruiz-Aravena M, McKee C, Gamble A, Lunn T, Morris A, Snedden CE, et al. Ecology,  
478 evolution and spillover of coronaviruses from bats. *Nat Rev Microbiol.* 2022;20: 299–314.
- 479 21. The Verena Consortium. Building a global atlas of wildlife disease data. In: The Verena  
480 Blog. 2 Mar 2022. Available: [https://www.viralemergence.org/blog/building-a-global-atlas-of-](https://www.viralemergence.org/blog/building-a-global-atlas-of-wildlife-disease-data)  
481 [wildlife-disease-data](https://www.viralemergence.org/blog/building-a-global-atlas-of-wildlife-disease-data)
- 482 22. Alves RS, do Canto Olegário J, Weber MN, da Silva MS, Canova R, Sauthier JT, et al.  
483 Detection of coronavirus in vampire bats (*Desmodus rotundus*) in southern Brazil. *Transbound*  
484 *Emerg Dis.* 2021. doi:10.1111/tbed.14150
- 485 23. Bergner LM, Orton RJ, Streicker DG. Complete genome sequence of an  
486 alphacoronavirus from common vampire bats in Peru. *Microbiol Resour Announc.* 2020;9.  
487 doi:10.1128/MRA.00742-20
- 488 24. Becker DJ, Lei GS, Janech MG, Bland AM, Fenton MB, Simmons NB, Relich RF, Neely  
489 BA. Serum proteomics identifies immune pathways and candidate biomarkers of coronavirus  
490 infection in wild vampire bats. *Frontiers in Virology.* 2022; 2.
- 491 25. Kettenburg G, Kistler A, Ranaivoson HC, Ahyong V, Andrianiana A, Andry S, et al.  
492 Full genome nobecovirus sequences from Malagasy fruit bats define a unique evolutionary  
493 history for this coronavirus clade. *Front Public Health.* 2022;10: 786060.

- 494 26. Hoarau AOG, Goodman SM, Al Halabi D, Ramasindrazana B, Lagadec E, Le Minter G,  
495 et al. Investigation of astrovirus, coronavirus and paramyxovirus co-infections in bats in the  
496 western Indian Ocean. *Virology*. 2021;18: 205.
- 497 27. Plowright RK, Becker DJ, McCallum H, Manlove KR. Sampling to elucidate the  
498 dynamics of infections in reservoir hosts. *Philos Trans R Soc Lond B Biol Sci*. 2019;374:  
499 20180336.
- 500 28. Thompson CW, Phelps KL, Allard MW, Cook JA, Dunnun JL, Ferguson AW, et al.  
501 Preserve a voucher specimen! The critical need for integrating natural history collections in  
502 infectious disease studies. *MBio*. 2021;12.
- 503 29. Moher D, Liberati A, Tetzlaff J, Altman DG. Preferred reporting items for systematic  
504 reviews and meta-analyses: the PRISMA statement. *BMJ*. 2009;339. doi:10.1136/bmj.b2535
- 505 30. Lüdecke D, Ben-Shachar M, Patil I, Waggoner P, Makowski D. *performance*: An R  
506 package for assessment, comparison and testing of statistical models. *Journal of Open Source*  
507 *Software*. 2021, 3139.
- 508 31. Benjamini Y, Hochberg Y. Controlling the false discovery rate: A practical and powerful  
509 approach to multiple testing. *J R Stat Soc*. 1995;57: 289–300.
- 510 32. Orme D, Freckleton R, Thomas G, Petzoldt T, Fritz S, Isaac N, et al. caper: comparative  
511 analyses of phylogenetics and evolution in R. 2012;2: 458.
- 512 33. Fritz SA, Purvis A. Phylogenetic diversity does not capture body size variation at risk in  
513 the world's mammals. *Proc Biol Sci*. 2010;277: 2435–2441.
- 514 34. Pagel M. Inferring the historical patterns of biological evolution. *Nature*. 1999;401: 877–  
515 884.
- 516 35. Crowley D, Becker D, Washburne A, Plowright R. Identifying suspect bat reservoirs of  
517 emerging infections. *Vaccines*. 2020; 8.
- 518 36. Holm S. A simple sequentially rejective multiple test procedure. *Scand Stat Theory Appl*.  
519 1979;6: 65–70.
- 520 37. Senior AM, Grueber CE, Kamiya T, Lagisz M, O'Dwyer K, Santos ESA, et al.  
521 Heterogeneity in ecological and evolutionary meta-analyses: its magnitude and implications.  
522 *Ecology*. 2016;97: 3293–3299.
- 523 38. Zuur AF, Ieno EN, Elphick CS. A protocol for data exploration to avoid common  
524 statistical problems. *Methods Ecol Evol*. 2010;1: 3–14.
- 525 39. López-López JA, Marín-Martínez F, Sánchez-Meca J, Van den Noortgate W,  
526 Viechtbauer W. Estimation of the predictive power of the model in mixed-effects meta-  
527 regression: A simulation study. *Br J Math Stat Psychol*. 2014;67: 30–48.
